# Supplementary material for: Imputation of Ancient Whole Genome Sus scrofa DNA Introduces Biases Toward Main Population Components in the Reference Panel
Source: Front Genet. 2022 Jul 12;13:872486. doi: 10.3389/fgene.2022.872486 (PMC9315352; doi:10.3389/fgene.2022.872486)
Supplement: Supplementary file 1 [file Table2.XLSX]

## Sheet: Blad1
chr	Id	cM	bp
1	.	0.919629	1000000
1	.	1.87376	2000000
1	.	2.55672	3000000
1	.	3.67297	4000000
1	.	5.18717	5000000
1	.	8.26546	6000000
1	.	10.5328	7000000
1	.	12.0047	8000000
1	.	14.0601	9000000
1	.	15.4548	10000000
1	.	16.7892	11000000
1	.	19.341	12000000
1	.	21.6521	13000000
1	.	25.2187	14000000
1	.	27.6095	15000000
1	.	29.5337	16000000
1	.	31.0067	17000000
1	.	32.3667	18000000
1	.	33.281	19000000
1	.	33.9697	20000000
1	.	35.6656	21000000
1	.	36.8507	22000000
1	.	37.1965	23000000
1	.	37.5853	24000000
1	.	38.2044	25000000
1	.	39.613	26000000
1	.	40.844	27000000
1	.	41.6847	28000000
1	.	42.9238	29000000
1	.	44.5844	30000000
1	.	45.7324	31000000
1	.	46.7791	32000000
1	.	47.9998	33000000
1	.	48.5055	34000000
1	.	49.0906	35000000
1	.	49.5693	36000000
1	.	50.0969	37000000
1	.	50.5457	38000000
1	.	50.967	39000000
1	.	51.2284	40000000
1	.	51.5424	41000000
1	.	51.9433	42000000
1	.	52.3753	43000000
1	.	52.7088	44000000
1	.	53.0241	45000000
1	.	53.2864	46000000
1	.	53.5457	47000000
1	.	53.8378	48000000
1	.	54.1829	49000000
1	.	54.5118	50000000
1	.	54.9688	51000000
1	.	55.4915	52000000
1	.	55.9279	53000000
1	.	56.3337	54000000
1	.	56.6848	55000000
1	.	57.2289	56000000
1	.	57.7252	57000000
1	.	58.1954	58000000
1	.	58.4675	59000000
1	.	58.7204	60000000
1	.	58.9073	61000000
1	.	59.0935	62000000
1	.	59.288	63000000
1	.	59.4638	64000000
1	.	59.7555	65000000
1	.	60.0649	66000000
1	.	60.3098	67000000
1	.	60.5083	68000000
1	.	60.6838	69000000
1	.	60.882	70000000
1	.	61.2073	71000000
1	.	61.5326	72000000
1	.	61.7845	73000000
1	.	62.0805	74000000
1	.	62.3269	75000000
1	.	62.5346	76000000
1	.	62.8135	77000000
1	.	63.0458	78000000
1	.	63.2096	79000000
1	.	63.3609	80000000
1	.	63.5024	81000000
1	.	63.6257	82000000
1	.	63.756	83000000
1	.	63.902	84000000
1	.	64.0783	85000000
1	.	64.2382	86000000
1	.	64.3372	87000000
1	.	64.4542	88000000
1	.	64.5647	89000000
1	.	64.6671	90000000
1	.	64.7863	91000000
1	.	64.8793	92000000
1	.	64.9211	93000000
1	.	65.1752	94000000
1	.	65.3849	95000000
1	.	65.6829	96000000
1	.	66.127	97000000
1	.	66.4491	98000000
1	.	66.758	99000000
1	.	66.9746	100000000
1	.	67.1308	101000000
1	.	67.3715	102000000
1	.	67.5988	103000000
1	.	67.9035	104000000
1	.	68.201	105000000
1	.	68.506	106000000
1	.	68.7028	107000000
1	.	68.9949	108000000
1	.	69.6009	109000000
1	.	70.1192	110000000
1	.	70.3684	111000000
1	.	70.694	112000000
1	.	70.9178	113000000
1	.	71.261	114000000
1	.	71.3472	115000000
1	.	71.4722	116000000
1	.	71.651	117000000
1	.	71.7858	118000000
1	.	71.9783	119000000
1	.	72.1749	120000000
1	.	72.35	121000000
1	.	72.4921	122000000
1	.	72.7324	123000000
1	.	72.9507	124000000
1	.	73.1523	125000000
1	.	73.3234	126000000
1	.	73.5602	127000000
1	.	73.756	128000000
1	.	74.0928	129000000
1	.	74.2937	130000000
1	.	74.4916	131000000
1	.	74.6746	132000000
1	.	74.8374	133000000
1	.	74.9735	134000000
1	.	75.086	135000000
1	.	75.2051	136000000
1	.	75.4551	137000000
1	.	75.6462	138000000
1	.	75.9632	139000000
1	.	76.2306	140000000
1	.	76.4565	141000000
1	.	76.7667	142000000
1	.	77.063	143000000
1	.	77.2907	144000000
1	.	77.7065	145000000
1	.	78.0481	146000000
1	.	78.5481	147000000
1	.	78.8651	148000000
1	.	79.0349	149000000
1	.	79.1803	150000000
1	.	79.2479	151000000
1	.	79.3801	152000000
1	.	79.4911	153000000
1	.	79.6245	154000000
1	.	79.7549	155000000
1	.	79.893	156000000
1	.	80.0493	157000000
1	.	80.303	158000000
1	.	80.5263	159000000
1	.	80.739	160000000
1	.	81.0404	161000000
1	.	81.4338	162000000
1	.	81.8015	163000000
1	.	82.3247	164000000
1	.	82.6409	165000000
1	.	82.9573	166000000
1	.	83.3842	167000000
1	.	83.782	168000000
1	.	83.9371	169000000
1	.	84.0433	170000000
1	.	84.1857	171000000
1	.	84.2605	172000000
1	.	84.3457	173000000
1	.	84.4424	174000000
1	.	84.5362	175000000
1	.	84.6472	176000000
1	.	84.7639	177000000
1	.	84.8817	178000000
1	.	85.0764	179000000
1	.	85.2393	180000000
1	.	85.4655	181000000
1	.	85.6646	182000000
1	.	85.916	183000000
1	.	86.2257	184000000
1	.	86.652	185000000
1	.	86.889	186000000
1	.	87.1521	187000000
1	.	87.3535	188000000
1	.	87.4878	189000000
1	.	87.6431	190000000
1	.	87.8639	191000000
1	.	88.1291	192000000
1	.	88.2953	193000000
1	.	88.4384	194000000
1	.	88.5423	195000000
1	.	88.6563	196000000
1	.	88.8183	197000000
1	.	88.9239	198000000
1	.	89.0359	199000000
1	.	89.1204	200000000
1	.	89.2698	201000000
1	.	89.541	202000000
1	.	89.809	203000000
1	.	89.9813	204000000
1	.	90.211	205000000
1	.	90.4796	206000000
1	.	90.7362	207000000
1	.	91.0552	208000000
1	.	91.2748	209000000
1	.	91.3661	210000000
1	.	91.4763	211000000
1	.	91.6271	212000000
1	.	91.8132	213000000
1	.	92.0203	214000000
1	.	92.1629	215000000
1	.	92.3622	216000000
1	.	92.6298	217000000
1	.	92.8102	218000000
1	.	93.107	219000000
1	.	93.4275	220000000
1	.	93.8358	221000000
1	.	94.3917	222000000
1	.	94.77	223000000
1	.	95.0011	224000000
1	.	95.2043	225000000
1	.	95.3603	226000000
1	.	95.5821	227000000
1	.	95.805	228000000
1	.	96.2385	229000000
1	.	96.6654	230000000
1	.	96.9819	231000000
1	.	97.2887	232000000
1	.	97.5151	233000000
1	.	97.8492	234000000
1	.	98.1877	235000000
1	.	98.6134	236000000
1	.	99.0708	237000000
1	.	99.4929	238000000
1	.	100.203	239000000
1	.	101.183	240000000
1	.	101.524	241000000
1	.	101.884	242000000
1	.	102.177	243000000
1	.	102.378	244000000
1	.	102.669	245000000
1	.	103.073	246000000
1	.	103.936	247000000
1	.	105.063	248000000
1	.	105.57	249000000
1	.	106.809	250000000
1	.	108.058	251000000
1	.	109.197	252000000
1	.	110.335	253000000
1	.	112.809	254000000
1	.	114.145	255000000
1	.	115.14	256000000
1	.	116.616	257000000
1	.	117.844	258000000
1	.	119.967	259000000
1	.	121.283	260000000
1	.	122.645	261000000
1	.	123.954	262000000
1	.	124.476	263000000
1	.	125.614	264000000
1	.	127.327	265000000
1	.	128.773	266000000
1	.	130.926	267000000
1	.	133.688	268000000
1	.	136.327	269000000
1	.	140.07	270000000
1	.	142.039	271000000
1	.	144.436	272000000
1	.	146.825	273000000
1	.	147.287	274000000
1	.	147.287	274287862
2	.	0.106805	1000000
2	.	2.36194	2000000
2	.	5.97002	3000000
2	.	8.64645	4000000
2	.	10.4559	5000000
2	.	12.1286	6000000
2	.	15.1043	7000000
2	.	17.6038	8000000
2	.	20.6361	9000000
2	.	22.6168	10000000
2	.	24.27	11000000
2	.	26.2383	12000000
2	.	28.8862	13000000
2	.	31.79	14000000
2	.	32.8241	15000000
2	.	35.0587	16000000
2	.	38.458	17000000
2	.	39.9709	18000000
2	.	40.6064	19000000
2	.	41.9743	20000000
2	.	43.058	21000000
2	.	43.5337	22000000
2	.	44.5999	23000000
2	.	45.718	24000000
2	.	47.3702	25000000
2	.	48.781	26000000
2	.	49.6138	27000000
2	.	50.646	28000000
2	.	51.2003	29000000
2	.	51.6587	30000000
2	.	52.1085	31000000
2	.	52.6524	32000000
2	.	53.0021	33000000
2	.	53.2465	34000000
2	.	53.4701	35000000
2	.	53.8382	36000000
2	.	54.2784	37000000
2	.	54.7296	38000000
2	.	56.1239	39000000
2	.	56.876	40000000
2	.	57.4411	41000000
2	.	57.8369	42000000
2	.	58.5322	43000000
2	.	58.8645	44000000
2	.	59.2859	45000000
2	.	59.7231	46000000
2	.	60.1689	47000000
2	.	60.5653	48000000
2	.	60.7454	49000000
2	.	60.8703	50000000
2	.	61.0074	51000000
2	.	61.1737	52000000
2	.	61.5041	53000000
2	.	61.6899	54000000
2	.	61.7618	55000000
2	.	61.8984	56000000
2	.	62.0663	57000000
2	.	62.2511	58000000
2	.	62.4177	59000000
2	.	62.667	60000000
2	.	62.8198	61000000
2	.	62.9668	62000000
2	.	63.0931	63000000
2	.	63.3722	64000000
2	.	63.6456	65000000
2	.	63.8759	66000000
2	.	64.1061	67000000
2	.	64.49	68000000
2	.	64.7678	69000000
2	.	65.0733	70000000
2	.	65.3012	71000000
2	.	65.6176	72000000
2	.	65.8263	73000000
2	.	65.967	74000000
2	.	66.2324	75000000
2	.	66.4945	76000000
2	.	66.6764	77000000
2	.	67.0169	78000000
2	.	67.3703	79000000
2	.	67.6964	80000000
2	.	68.1048	81000000
2	.	68.6042	82000000
2	.	69.049	83000000
2	.	69.3639	84000000
2	.	70.0134	85000000
2	.	70.3543	86000000
2	.	70.8099	87000000
2	.	71.2202	88000000
2	.	71.5557	89000000
2	.	71.7894	90000000
2	.	72.0912	91000000
2	.	72.3522	92000000
2	.	72.5073	93000000
2	.	72.6951	94000000
2	.	72.8785	95000000
2	.	73.0758	96000000
2	.	73.2581	97000000
2	.	73.5256	98000000
2	.	73.7924	99000000
2	.	74.1025	100000000
2	.	74.5568	101000000
2	.	74.7965	102000000
2	.	75.1551	103000000
2	.	75.3674	104000000
2	.	75.6304	105000000
2	.	75.942	106000000
2	.	76.1828	107000000
2	.	76.4534	108000000
2	.	76.629	109000000
2	.	76.7598	110000000
2	.	76.9151	111000000
2	.	77.4424	112000000
2	.	77.8869	113000000
2	.	78.4086	114000000
2	.	78.8314	115000000
2	.	79.553	116000000
2	.	80.3874	117000000
2	.	81.152	118000000
2	.	81.8433	119000000
2	.	83.0939	120000000
2	.	83.6682	121000000
2	.	84.1531	122000000
2	.	85.0403	123000000
2	.	85.652	124000000
2	.	86.513	125000000
2	.	88.2538	126000000
2	.	90.293	127000000
2	.	93.2639	128000000
2	.	95.6203	129000000
2	.	97.0758	130000000
2	.	98.5438	131000000
2	.	99.7405	132000000
2	.	100.566	133000000
2	.	101.573	134000000
2	.	103.319	135000000
2	.	105.231	136000000
2	.	107.698	137000000
2	.	109.954	138000000
2	.	111.9	139000000
2	.	112.878	140000000
2	.	114.629	141000000
2	.	116.219	142000000
2	.	119.018	143000000
2	.	122.24	144000000
2	.	123.515	145000000
2	.	125.185	146000000
2	.	126.798	147000000
2	.	128.657	148000000
2	.	129.965	149000000
2	.	131.268	150000000
2	.	131.837	151000000
2	.	131.837	151917421
3	.	1.50427	1000000
3	.	3.78572	2000000
3	.	7.77719	3000000
3	.	9.94821	4000000
3	.	15.4677	5000000
3	.	17.3452	6000000
3	.	17.9289	7000000
3	.	19.2648	8000000
3	.	21.1329	9000000
3	.	22.1685	10000000
3	.	24.893	11000000
3	.	27.4621	12000000
3	.	29.1747	13000000
3	.	32.3628	14000000
3	.	37.2781	15000000
3	.	39.6556	16000000
3	.	41.3782	17000000
3	.	42.8795	18000000
3	.	44.3517	19000000
3	.	46.4389	20000000
3	.	47.3672	21000000
3	.	48.2255	22000000
3	.	48.7301	23000000
3	.	49.1231	24000000
3	.	50.0235	25000000
3	.	50.5451	26000000
3	.	51.4043	27000000
3	.	52.0711	28000000
3	.	52.6089	29000000
3	.	53.2104	30000000
3	.	53.5591	31000000
3	.	53.9893	32000000
3	.	54.5264	33000000
3	.	55.593	34000000
3	.	56.1962	35000000
3	.	56.8335	36000000
3	.	57.0704	37000000
3	.	57.2185	38000000
3	.	57.2881	39000000
3	.	57.4011	40000000
3	.	57.4377	41000000
3	.	57.5881	42000000
3	.	57.7285	43000000
3	.	58.0147	44000000
3	.	58.3678	45000000
3	.	58.7866	46000000
3	.	59.2697	47000000
3	.	59.7317	48000000
3	.	60.3683	49000000
3	.	60.6482	50000000
3	.	60.9219	51000000
3	.	61.3345	52000000
3	.	61.805	53000000
3	.	62.2266	54000000
3	.	62.5789	55000000
3	.	62.9536	56000000
3	.	63.3965	57000000
3	.	63.8784	58000000
3	.	64.3412	59000000
3	.	64.6942	60000000
3	.	64.8568	61000000
3	.	65.1196	62000000
3	.	65.5785	63000000
3	.	65.974	64000000
3	.	66.2637	65000000
3	.	66.5228	66000000
3	.	66.8451	67000000
3	.	67.545	68000000
3	.	68.0409	69000000
3	.	68.6866	70000000
3	.	69.2883	71000000
3	.	69.7863	72000000
3	.	70.6818	73000000
3	.	71.483	74000000
3	.	72.0954	75000000
3	.	72.4925	76000000
3	.	72.9101	77000000
3	.	73.0897	78000000
3	.	73.3979	79000000
3	.	73.5439	80000000
3	.	73.8778	81000000
3	.	74.0879	82000000
3	.	74.3038	83000000
3	.	74.5656	84000000
3	.	74.9018	85000000
3	.	75.2188	86000000
3	.	75.4484	87000000
3	.	75.6193	88000000
3	.	75.882	89000000
3	.	76.1844	90000000
3	.	76.7169	91000000
3	.	77.1057	92000000
3	.	77.8838	93000000
3	.	79.1412	94000000
3	.	79.8013	95000000
3	.	80.4279	96000000
3	.	81.3408	97000000
3	.	82.0314	98000000
3	.	82.4609	99000000
3	.	83.0166	100000000
3	.	83.4166	101000000
3	.	83.9592	102000000
3	.	84.6062	103000000
3	.	85.1944	104000000
3	.	85.765	105000000
3	.	86.8018	106000000
3	.	87.3424	107000000
3	.	89.0597	108000000
3	.	90.3779	109000000
3	.	92.4647	110000000
3	.	94.064	111000000
3	.	96.3184	112000000
3	.	97.9104	113000000
3	.	99.2766	114000000
3	.	100.678	115000000
3	.	102.092	116000000
3	.	104.374	117000000
3	.	106.465	118000000
3	.	107.732	119000000
3	.	109.713	120000000
3	.	113.211	121000000
3	.	114.986	122000000
3	.	116.468	123000000
3	.	119.337	124000000
3	.	122.929	125000000
3	.	124.794	126000000
3	.	126.566	127000000
3	.	127.818	128000000
3	.	128.654	129000000
3	.	129.355	130000000
3	.	129.999	131000000
3	.	130.64	132000000
3	.	130.64	132700427
4	.	0.781815	1000000
4	.	2.27748	2000000
4	.	4.30089	3000000
4	.	6.07462	4000000
4	.	7.71018	5000000
4	.	10.0355	6000000
4	.	14.0733	7000000
4	.	17.6239	8000000
4	.	20.9511	9000000
4	.	23.0334	10000000
4	.	25.1905	11000000
4	.	27.9745	12000000
4	.	29.1644	13000000
4	.	30.9325	14000000
4	.	33.2184	15000000
4	.	34.7964	16000000
4	.	36.2435	17000000
4	.	38.0015	18000000
4	.	39.6301	19000000
4	.	41.343	20000000
4	.	42.2695	21000000
4	.	43.7236	22000000
4	.	44.4309	23000000
4	.	44.7104	24000000
4	.	44.8941	25000000
4	.	45.2516	26000000
4	.	45.638	27000000
4	.	46.0879	28000000
4	.	46.4763	29000000
4	.	47.0013	30000000
4	.	47.55	31000000
4	.	48.179	32000000
4	.	48.6846	33000000
4	.	49.4362	34000000
4	.	50.2402	35000000
4	.	50.9279	36000000
4	.	51.1604	37000000
4	.	51.604	38000000
4	.	52.4559	39000000
4	.	53.1142	40000000
4	.	53.5459	41000000
4	.	53.7856	42000000
4	.	54.0943	43000000
4	.	54.3682	44000000
4	.	54.4777	45000000
4	.	54.6196	46000000
4	.	54.7497	47000000
4	.	54.8631	48000000
4	.	54.9682	49000000
4	.	55.1344	50000000
4	.	55.2891	51000000
4	.	55.4659	52000000
4	.	55.5604	53000000
4	.	55.6951	54000000
4	.	56.026	55000000
4	.	56.5313	56000000
4	.	56.8506	57000000
4	.	57.0836	58000000
4	.	57.4679	59000000
4	.	57.7275	60000000
4	.	58.101	61000000
4	.	58.5664	62000000
4	.	59.0356	63000000
4	.	59.5268	64000000
4	.	59.9395	65000000
4	.	60.3042	66000000
4	.	60.5583	67000000
4	.	60.7782	68000000
4	.	61.0869	69000000
4	.	61.7108	70000000
4	.	62.2492	71000000
4	.	62.9879	72000000
4	.	63.6513	73000000
4	.	64.3955	74000000
4	.	65.3775	75000000
4	.	66.1659	76000000
4	.	66.7989	77000000
4	.	67.3601	78000000
4	.	68.0422	79000000
4	.	68.3026	80000000
4	.	68.6187	81000000
4	.	68.9244	82000000
4	.	69.3175	83000000
4	.	69.8805	84000000
4	.	70.7572	85000000
4	.	71.3073	86000000
4	.	71.875	87000000
4	.	72.4389	88000000
4	.	73.1964	89000000
4	.	74.0465	90000000
4	.	74.6997	91000000
4	.	75.453	92000000
4	.	76.2223	93000000
4	.	76.9486	94000000
4	.	77.8036	95000000
4	.	78.7914	96000000
4	.	79.3915	97000000
4	.	79.7998	98000000
4	.	80.3784	99000000
4	.	80.9365	100000000
4	.	81.7066	101000000
4	.	82.5244	102000000
4	.	83.9208	103000000
4	.	85.9094	104000000
4	.	86.9988	105000000
4	.	88.1746	106000000
4	.	89.5783	107000000
4	.	91.7657	108000000
4	.	94.5952	109000000
4	.	96.1158	110000000
4	.	97.8089	111000000
4	.	99.3133	112000000
4	.	100.681	113000000
4	.	101.668	114000000
4	.	103.056	115000000
4	.	104.344	116000000
4	.	106.658	117000000
4	.	108.521	118000000
4	.	111.057	119000000
4	.	112.95	120000000
4	.	115.928	121000000
4	.	117.614	122000000
4	.	119.426	123000000
4	.	120.584	124000000
4	.	122.525	125000000
4	.	124.385	126000000
4	.	125.552	127000000
4	.	127.404	128000000
4	.	128.258	129000000
4	.	129.255	130000000
4	.	129.255	130900910
5	.	1.32087	1000000
5	.	3.81435	2000000
5	.	5.97224	3000000
5	.	9.44099	4000000
5	.	12.0958	5000000
5	.	13.7829	6000000
5	.	15.4038	7000000
5	.	17.416	8000000
5	.	19.5638	9000000
5	.	23.0614	10000000
5	.	30.1031	11000000
5	.	35.0967	12000000
5	.	36.6446	13000000
5	.	39.2626	14000000
5	.	40.4756	15000000
5	.	41.6618	16000000
5	.	43.6703	17000000
5	.	45.3062	18000000
5	.	46.7652	19000000
5	.	47.3896	20000000
5	.	48.0241	21000000
5	.	48.6656	22000000
5	.	49.1534	23000000
5	.	49.7295	24000000
5	.	50.3188	25000000
5	.	50.746	26000000
5	.	51.3425	27000000
5	.	52.0593	28000000
5	.	52.623	29000000
5	.	53.3726	30000000
5	.	54.0108	31000000
5	.	54.4878	32000000
5	.	54.9376	33000000
5	.	55.4383	34000000
5	.	55.8737	35000000
5	.	56.1413	36000000
5	.	56.3498	37000000
5	.	56.6077	38000000
5	.	56.6879	39000000
5	.	56.7306	40000000
5	.	56.9412	41000000
5	.	57.1002	42000000
5	.	57.3955	43000000
5	.	57.5578	44000000
5	.	57.8321	45000000
5	.	58.145	46000000
5	.	58.4656	47000000
5	.	58.7989	48000000
5	.	59.0904	49000000
5	.	59.4088	50000000
5	.	59.7109	51000000
5	.	59.9787	52000000
5	.	60.298	53000000
5	.	60.5803	54000000
5	.	60.7968	55000000
5	.	61.1233	56000000
5	.	62.0419	57000000
5	.	63.1287	58000000
5	.	64.0833	59000000
5	.	65.8265	60000000
5	.	67.2012	61000000
5	.	68.8343	62000000
5	.	69.9668	63000000
5	.	72.1882	64000000
5	.	75.3698	65000000
5	.	77.3728	66000000
5	.	78.4141	67000000
5	.	78.8998	68000000
5	.	79.6057	69000000
5	.	80.3333	70000000
5	.	81.0836	71000000
5	.	82.2796	72000000
5	.	83.1538	73000000
5	.	84.5197	74000000
5	.	85.6793	75000000
5	.	86.7053	76000000
5	.	87.948	77000000
5	.	88.9127	78000000
5	.	90.0081	79000000
5	.	91.419	80000000
5	.	92.5483	81000000
5	.	93.3648	82000000
5	.	94.3852	83000000
5	.	95.7415	84000000
5	.	96.9457	85000000
5	.	98.9869	86000000
5	.	101.839	87000000
5	.	103.523	88000000
5	.	105.368	89000000
5	.	106.798	90000000
5	.	108.027	91000000
5	.	109.12	92000000
5	.	111.08	93000000
5	.	113.675	94000000
5	.	115.246	95000000
5	.	117.011	96000000
5	.	118.636	97000000
5	.	120.528	98000000
5	.	122.048	99000000
5	.	123.679	100000000
5	.	124.636	101000000
5	.	125.468	102000000
5	.	126.18	103000000
5	.	126.609	104000000
5	.	126.609	104477606
6	.	1.0543	1000000
6	.	3.08514	2000000
6	.	6.13131	3000000
6	.	8.73359	4000000
6	.	10.2466	5000000
6	.	12.259	6000000
6	.	13.8767	7000000
6	.	17.9573	8000000
6	.	20.893	9000000
6	.	23.7982	10000000
6	.	26.6091	11000000
6	.	28.1622	12000000
6	.	29.2259	13000000
6	.	30.3222	14000000
6	.	31.2626	15000000
6	.	32.602	16000000
6	.	33.5963	17000000
6	.	34.5795	18000000
6	.	36.4462	19000000
6	.	37.6624	20000000
6	.	38.6628	21000000
6	.	39.6536	22000000
6	.	40.5387	23000000
6	.	40.7906	24000000
6	.	41.9302	25000000
6	.	43.9275	26000000
6	.	44.2932	27000000
6	.	45.2127	28000000
6	.	46.3236	29000000
6	.	48.4224	30000000
6	.	49.423	31000000
6	.	50.9204	32000000
6	.	54.1193	33000000
6	.	54.9861	34000000
6	.	56.8169	35000000
6	.	58.0613	36000000
6	.	58.8468	37000000
6	.	59.7553	38000000
6	.	61.2922	39000000
6	.	63.0884	40000000
6	.	64.5224	41000000
6	.	65.3172	42000000
6	.	65.7195	43000000
6	.	66.1769	44000000
6	.	66.7085	45000000
6	.	67.0344	46000000
6	.	67.5464	47000000
6	.	67.8998	48000000
6	.	68.1376	49000000
6	.	68.3799	50000000
6	.	68.6604	51000000
6	.	68.7592	52000000
6	.	68.8818	53000000
6	.	69.1221	54000000
6	.	69.295	55000000
6	.	69.4459	56000000
6	.	69.6218	57000000
6	.	69.9632	58000000
6	.	70.1363	59000000
6	.	70.3326	60000000
6	.	70.4754	61000000
6	.	70.6493	62000000
6	.	70.8951	63000000
6	.	71.3592	64000000
6	.	72.0134	65000000
6	.	72.8063	66000000
6	.	73.2367	67000000
6	.	73.7451	68000000
6	.	74.1426	69000000
6	.	74.6479	70000000
6	.	75.2622	71000000
6	.	76.1056	72000000
6	.	76.9597	73000000
6	.	77.7435	74000000
6	.	78.219	75000000
6	.	79.1844	76000000
6	.	79.7237	77000000
6	.	80.3824	78000000
6	.	80.8433	79000000
6	.	81.4951	80000000
6	.	81.8628	81000000
6	.	82.3445	82000000
6	.	82.8518	83000000
6	.	83.2703	84000000
6	.	83.5959	85000000
6	.	84.1909	86000000
6	.	84.8376	87000000
6	.	85.4644	88000000
6	.	86.048	89000000
6	.	86.5169	90000000
6	.	86.7045	91000000
6	.	87.3771	92000000
6	.	87.8843	93000000
6	.	88.4123	94000000
6	.	88.8388	95000000
6	.	89.2175	96000000
6	.	89.7534	97000000
6	.	90.0362	98000000
6	.	90.578	99000000
6	.	91.1018	100000000
6	.	91.4738	101000000
6	.	91.8434	102000000
6	.	92.2223	103000000
6	.	92.4318	104000000
6	.	92.5909	105000000
6	.	92.7783	106000000
6	.	93.064	107000000
6	.	93.5909	108000000
6	.	93.8393	109000000
6	.	94.0664	110000000
6	.	94.3454	111000000
6	.	94.6714	112000000
6	.	94.7936	113000000
6	.	94.9179	114000000
6	.	95.2731	115000000
6	.	95.4762	116000000
6	.	95.6188	117000000
6	.	95.9388	118000000
6	.	96.283	119000000
6	.	96.8568	120000000
6	.	97.3192	121000000
6	.	97.4234	122000000
6	.	97.7096	123000000
6	.	97.9019	124000000
6	.	98.1048	125000000
6	.	98.2842	126000000
6	.	98.6283	127000000
6	.	99.0657	128000000
6	.	99.399	129000000
6	.	99.7184	130000000
6	.	100.169	131000000
6	.	100.633	132000000
6	.	101.071	133000000
6	.	101.527	134000000
6	.	102.151	135000000
6	.	103.261	136000000
6	.	103.894	137000000
6	.	104.265	138000000
6	.	104.534	139000000
6	.	104.858	140000000
6	.	105.382	141000000
6	.	106.003	142000000
6	.	106.743	143000000
6	.	107.636	144000000
6	.	109.337	145000000
6	.	111.211	146000000
6	.	113.277	147000000
6	.	115.799	148000000
6	.	117.145	149000000
6	.	119.187	150000000
6	.	120.522	151000000
6	.	121.891	152000000
6	.	124.353	153000000
6	.	126.49	154000000
6	.	129.682	155000000
6	.	131.485	156000000
6	.	133.48	157000000
6	.	135.72	158000000
6	.	137.069	159000000
6	.	137.941	160000000
6	.	138.39	161000000
6	.	139.373	162000000
6	.	142.158	163000000
6	.	143.785	164000000
6	.	145.475	165000000
6	.	147.094	166000000
6	.	148.589	167000000
6	.	149.797	168000000
6	.	150.637	169000000
6	.	151.261	170000000
6	.	151.261	170825645
7	.	0.895321	1000000
7	.	2.59809	2000000
7	.	4.92287	3000000
7	.	8.02519	4000000
7	.	11.7542	5000000
7	.	14.7155	6000000
7	.	19.71	7000000
7	.	23.0419	8000000
7	.	27.4055	9000000
7	.	30.0254	10000000
7	.	32.9226	11000000
7	.	35.2106	12000000
7	.	36.8479	13000000
7	.	38.2007	14000000
7	.	40.0498	15000000
7	.	42.1331	16000000
7	.	43.9318	17000000
7	.	44.6676	18000000
7	.	46.1883	19000000
7	.	47.1028	20000000
7	.	47.4759	21000000
7	.	47.9853	22000000
7	.	48.5843	23000000
7	.	49.04	24000000
7	.	49.7099	25000000
7	.	50.7854	26000000
7	.	51.4276	27000000
7	.	51.99	28000000
7	.	52.8143	29000000
7	.	53.4095	30000000
7	.	53.7936	31000000
7	.	54.2795	32000000
7	.	54.6921	33000000
7	.	55.4439	34000000
7	.	56.4123	35000000
7	.	57.4883	36000000
7	.	58.244	37000000
7	.	59.1993	38000000
7	.	60.441	39000000
7	.	61.754	40000000
7	.	62.9455	41000000
7	.	63.9412	42000000
7	.	64.7641	43000000
7	.	65.5002	44000000
7	.	66.267	45000000
7	.	67.1121	46000000
7	.	67.7583	47000000
7	.	68.4723	48000000
7	.	69.3394	49000000
7	.	69.9778	50000000
7	.	70.5014	51000000
7	.	70.8927	52000000
7	.	71.2849	53000000
7	.	71.7011	54000000
7	.	72.003	55000000
7	.	72.293	56000000
7	.	72.6298	57000000
7	.	72.9697	58000000
7	.	73.3176	59000000
7	.	73.549	60000000
7	.	73.8147	61000000
7	.	74.0403	62000000
7	.	74.3983	63000000
7	.	74.69	64000000
7	.	75.0955	65000000
7	.	75.4881	66000000
7	.	75.6728	67000000
7	.	75.8997	68000000
7	.	76.1147	69000000
7	.	76.3231	70000000
7	.	76.4849	71000000
7	.	76.5949	72000000
7	.	76.8971	73000000
7	.	77.2726	74000000
7	.	77.6421	75000000
7	.	78.0147	76000000
7	.	78.3431	77000000
7	.	78.5405	78000000
7	.	78.8215	79000000
7	.	79.2854	80000000
7	.	79.9008	81000000
7	.	80.487	82000000
7	.	81.0171	83000000
7	.	81.6051	84000000
7	.	82.3149	85000000
7	.	83.1917	86000000
7	.	83.6981	87000000
7	.	84.2628	88000000
7	.	84.7941	89000000
7	.	85.0884	90000000
7	.	85.6765	91000000
7	.	87.2222	92000000
7	.	88.3264	93000000
7	.	89.1747	94000000
7	.	90.1627	95000000
7	.	91.0189	96000000
7	.	92.3251	97000000
7	.	93.4301	98000000
7	.	95.0301	99000000
7	.	96.0102	100000000
7	.	97.1266	101000000
7	.	98.1862	102000000
7	.	98.726	103000000
7	.	99.7004	104000000
7	.	100.459	105000000
7	.	101.522	106000000
7	.	102.94	107000000
7	.	104.783	108000000
7	.	106.693	109000000
7	.	108.553	110000000
7	.	111.251	111000000
7	.	113.524	112000000
7	.	116.588	113000000
7	.	118.693	114000000
7	.	121.737	115000000
7	.	124.389	116000000
7	.	126.502	117000000
7	.	128.962	118000000
7	.	130.406	119000000
7	.	132.531	120000000
7	.	133.854	121000000
7	.	133.854	121782508
8	.	1.0077	1000000
8	.	2.72776	2000000
8	.	4.36859	3000000
8	.	7.36946	4000000
8	.	9.92982	5000000
8	.	11.7329	6000000
8	.	14.3521	7000000
8	.	16.54	8000000
8	.	17.8603	9000000
8	.	20.1454	10000000
8	.	23.2175	11000000
8	.	25.0134	12000000
8	.	26.2367	13000000
8	.	27.7968	14000000
8	.	29.0053	15000000
8	.	30.779	16000000
8	.	32.4105	17000000
8	.	35.8852	18000000
8	.	38.0811	19000000
8	.	39.5216	20000000
8	.	40.4296	21000000
8	.	41.0488	22000000
8	.	41.7771	23000000
8	.	42.325	24000000
8	.	42.7664	25000000
8	.	43.2348	26000000
8	.	43.764	27000000
8	.	44.4529	28000000
8	.	46.4031	29000000
8	.	47.5713	30000000
8	.	48.0744	31000000
8	.	49.3931	32000000
8	.	50.5873	33000000
8	.	51.093	34000000
8	.	51.5819	35000000
8	.	52.1481	36000000
8	.	52.975	37000000
8	.	53.9813	38000000
8	.	55.0083	39000000
8	.	55.5277	40000000
8	.	56.2663	41000000
8	.	56.4776	42000000
8	.	56.7881	43000000
8	.	56.9772	44000000
8	.	57.133	45000000
8	.	57.2061	46000000
8	.	57.395	47000000
8	.	57.7478	48000000
8	.	57.9286	49000000
8	.	58.0265	50000000
8	.	58.1231	51000000
8	.	58.2804	52000000
8	.	58.404	53000000
8	.	58.5147	54000000
8	.	58.7974	55000000
8	.	58.8908	56000000
8	.	59.0084	57000000
8	.	59.1297	58000000
8	.	59.283	59000000
8	.	59.4782	60000000
8	.	59.6227	61000000
8	.	59.8142	62000000
8	.	60.0198	63000000
8	.	60.2684	64000000
8	.	60.4995	65000000
8	.	60.7641	66000000
8	.	61.1023	67000000
8	.	61.4262	68000000
8	.	61.8643	69000000
8	.	62.419	70000000
8	.	63.0486	71000000
8	.	63.7057	72000000
8	.	64.1973	73000000
8	.	64.991	74000000
8	.	66.0289	75000000
8	.	66.842	76000000
8	.	67.4786	77000000
8	.	67.9875	78000000
8	.	68.5831	79000000
8	.	69.1225	80000000
8	.	69.6788	81000000
8	.	70.1899	82000000
8	.	70.6093	83000000
8	.	71.0393	84000000
8	.	71.4508	85000000
8	.	72.1493	86000000
8	.	72.7875	87000000
8	.	73.1457	88000000
8	.	73.3832	89000000
8	.	73.5333	90000000
8	.	73.6491	91000000
8	.	73.7885	92000000
8	.	73.9322	93000000
8	.	74.0879	94000000
8	.	74.2676	95000000
8	.	74.4925	96000000
8	.	74.6741	97000000
8	.	74.8292	98000000
8	.	75.1789	99000000
8	.	75.4489	100000000
8	.	75.7372	101000000
8	.	76.0728	102000000
8	.	76.5364	103000000
8	.	76.8282	104000000
8	.	77.1925	105000000
8	.	77.7119	106000000
8	.	77.8837	107000000
8	.	78.3198	108000000
8	.	79.3671	109000000
8	.	79.9556	110000000
8	.	80.7782	111000000
8	.	81.8592	112000000
8	.	82.9304	113000000
8	.	83.9521	114000000
8	.	84.8527	115000000
8	.	86.1493	116000000
8	.	86.8957	117000000
8	.	88.5462	118000000
8	.	89.8465	119000000
8	.	90.9922	120000000
8	.	92.5253	121000000
8	.	94.2939	122000000
8	.	96.8327	123000000
8	.	98.8906	124000000
8	.	100.422	125000000
8	.	101.851	126000000
8	.	103.555	127000000
8	.	105.205	128000000
8	.	107.734	129000000
8	.	110.967	130000000
8	.	114.771	131000000
8	.	116.85	132000000
8	.	118.714	133000000
8	.	120.782	134000000
8	.	122.19	135000000
8	.	123.732	136000000
8	.	124.36	137000000
8	.	124.972	138000000
8	.	124.972	138930735
9	.	0.706778	1000000
9	.	1.76226	2000000
9	.	2.61247	3000000
9	.	3.75543	4000000
9	.	5.04846	5000000
9	.	6.38101	6000000
9	.	7.81418	7000000
9	.	9.48634	8000000
9	.	11.427	9000000
9	.	13.4051	10000000
9	.	15.0578	11000000
9	.	16.54	12000000
9	.	20.6264	13000000
9	.	23.355	14000000
9	.	25.2692	15000000
9	.	27.404	16000000
9	.	29.053	17000000
9	.	30.4293	18000000
9	.	31.6226	19000000
9	.	32.6804	20000000
9	.	33.651	21000000
9	.	34.4308	22000000
9	.	35.5872	23000000
9	.	37.3324	24000000
9	.	39.3746	25000000
9	.	41.2729	26000000
9	.	42.3265	27000000
9	.	42.9304	28000000
9	.	43.3142	29000000
9	.	43.6098	30000000
9	.	44.1541	31000000
9	.	44.5857	32000000
9	.	45.0597	33000000
9	.	45.7448	34000000
9	.	46.1964	35000000
9	.	46.5158	36000000
9	.	47.1401	37000000
9	.	48.1521	38000000
9	.	49.1565	39000000
9	.	51.2646	40000000
9	.	52.8634	41000000
9	.	54.7164	42000000
9	.	56.5158	43000000
9	.	57.5138	44000000
9	.	58.7234	45000000
9	.	60.0008	46000000
9	.	61.5442	47000000
9	.	62.3737	48000000
9	.	63.0772	49000000
9	.	63.4787	50000000
9	.	63.695	51000000
9	.	63.9785	52000000
9	.	64.4777	53000000
9	.	65.1404	54000000
9	.	65.9405	55000000
9	.	66.3101	56000000
9	.	66.8544	57000000
9	.	67.3684	58000000
9	.	67.7321	59000000
9	.	67.9987	60000000
9	.	68.1683	61000000
9	.	68.2901	62000000
9	.	68.4223	63000000
9	.	69.131	64000000
9	.	70.3849	65000000
9	.	71.4111	66000000
9	.	72.4241	67000000
9	.	72.8832	68000000
9	.	73.1554	69000000
9	.	73.3811	70000000
9	.	73.6907	71000000
9	.	73.8808	72000000
9	.	74.0869	73000000
9	.	74.2592	74000000
9	.	74.5405	75000000
9	.	74.7566	76000000
9	.	74.9605	77000000
9	.	75.1746	78000000
9	.	75.3203	79000000
9	.	75.4347	80000000
9	.	75.5944	81000000
9	.	75.7963	82000000
9	.	75.9774	83000000
9	.	76.1611	84000000
9	.	76.3133	85000000
9	.	76.6652	86000000
9	.	76.8933	87000000
9	.	77.0853	88000000
9	.	77.2483	89000000
9	.	77.6398	90000000
9	.	77.9276	91000000
9	.	78.0547	92000000
9	.	78.3684	93000000
9	.	78.5073	94000000
9	.	78.6568	95000000
9	.	78.9218	96000000
9	.	79.1223	97000000
9	.	79.281	98000000
9	.	79.4815	99000000
9	.	79.6938	100000000
9	.	80.0493	101000000
9	.	80.4231	102000000
9	.	81.0439	103000000
9	.	81.708	104000000
9	.	82.3059	105000000
9	.	83.1955	106000000
9	.	84.2994	107000000
9	.	85.0238	108000000
9	.	85.8015	109000000
9	.	86.639	110000000
9	.	87.4575	111000000
9	.	88.1821	112000000
9	.	89.0811	113000000
9	.	89.7881	114000000
9	.	90.2523	115000000
9	.	90.7734	116000000
9	.	92.1719	117000000
9	.	93.4707	118000000
9	.	94.8047	119000000
9	.	95.7011	120000000
9	.	96.7759	121000000
9	.	97.9378	122000000
9	.	100.033	123000000
9	.	101.303	124000000
9	.	103.428	125000000
9	.	105.169	126000000
9	.	106.706	127000000
9	.	108.116	128000000
9	.	110.534	129000000
9	.	113.288	130000000
9	.	116.701	131000000
9	.	119.489	132000000
9	.	121.691	133000000
9	.	124.768	134000000
9	.	126.678	135000000
9	.	128.194	136000000
9	.	129.909	137000000
9	.	130.837	138000000
9	.	131.185	139000000
9	.	131.185	139401727
10	.	2.86347	1000000
10	.	5.71238	2000000
10	.	8.41576	3000000
10	.	10.3999	4000000
10	.	13.9752	5000000
10	.	17.3644	6000000
10	.	20.4965	7000000
10	.	23.0123	8000000
10	.	24.8262	9000000
10	.	26.5956	10000000
10	.	28.4329	11000000
10	.	29.8249	12000000
10	.	31.0058	13000000
10	.	31.9755	14000000
10	.	33.298	15000000
10	.	34.7749	16000000
10	.	37.2769	17000000
10	.	39.1807	18000000
10	.	40.6176	19000000
10	.	42.9775	20000000
10	.	45.5822	21000000
10	.	47.6612	22000000
10	.	50.7889	23000000
10	.	52.4784	24000000
10	.	53.6162	25000000
10	.	54.8329	26000000
10	.	55.8062	27000000
10	.	56.9377	28000000
10	.	57.7467	29000000
10	.	58.4836	30000000
10	.	58.9463	31000000
10	.	59.2847	32000000
10	.	59.695	33000000
10	.	60.1268	34000000
10	.	60.493	35000000
10	.	61.0536	36000000
10	.	61.7383	37000000
10	.	62.5485	38000000
10	.	64.3753	39000000
10	.	66.7105	40000000
10	.	67.9862	41000000
10	.	69.1526	42000000
10	.	70.6125	43000000
10	.	72.4184	44000000
10	.	73.8224	45000000
10	.	75.6012	46000000
10	.	77.5371	47000000
10	.	78.5724	48000000
10	.	79.5906	49000000
10	.	80.6568	50000000
10	.	82.3149	51000000
10	.	83.3723	52000000
10	.	84.8564	53000000
10	.	87.2827	54000000
10	.	88.6599	55000000
10	.	90.6368	56000000
10	.	92.0981	57000000
10	.	93.5103	58000000
10	.	95.6758	59000000
10	.	98.1225	60000000
10	.	100.652	61000000
10	.	103.16	62000000
10	.	106.687	63000000
10	.	109.305	64000000
10	.	111.366	65000000
10	.	113.065	66000000
10	.	114.532	67000000
10	.	115.455	68000000
10	.	115.86	69000000
10	.	115.86	69319537
11	.	0.953029	1000000
11	.	3.08332	2000000
11	.	5.69227	3000000
11	.	7.44707	4000000
11	.	9.01292	5000000
11	.	10.813	6000000
11	.	11.9167	7000000
11	.	12.9394	8000000
11	.	13.7758	9000000
11	.	14.7621	10000000
11	.	15.5699	11000000
11	.	16.6221	12000000
11	.	17.3321	13000000
11	.	18.5807	14000000
11	.	19.8127	15000000
11	.	20.9775	16000000
11	.	21.8781	17000000
11	.	22.846	18000000
11	.	24.0945	19000000
11	.	27.1612	20000000
11	.	29.878	21000000
11	.	31.8074	22000000
11	.	33.934	23000000
11	.	36.0867	24000000
11	.	38.4738	25000000
11	.	42.5773	26000000
11	.	43.7616	27000000
11	.	44.3589	28000000
11	.	44.9059	29000000
11	.	45.2882	30000000
11	.	45.6356	31000000
11	.	45.9339	32000000
11	.	46.1573	33000000
11	.	46.3042	34000000
11	.	46.4145	35000000
11	.	46.5534	36000000
11	.	46.7571	37000000
11	.	47.0219	38000000
11	.	47.2988	39000000
11	.	47.4733	40000000
11	.	47.7778	41000000
11	.	48.2769	42000000
11	.	48.6824	43000000
11	.	49.845	44000000
11	.	51.2945	45000000
11	.	52.9986	46000000
11	.	54.2934	47000000
11	.	55.431	48000000
11	.	56.4523	49000000
11	.	57.1521	50000000
11	.	58.3004	51000000
11	.	59.0638	52000000
11	.	59.3419	53000000
11	.	59.6177	54000000
11	.	59.8794	55000000
11	.	60.239	56000000
11	.	60.8308	57000000
11	.	61.373	58000000
11	.	62.0823	59000000
11	.	62.9839	60000000
11	.	64.1346	61000000
11	.	66.245	62000000
11	.	68.6604	63000000
11	.	69.9919	64000000
11	.	72.0469	65000000
11	.	74.8376	66000000
11	.	77.5967	67000000
11	.	79.3177	68000000
11	.	81.0594	69000000
11	.	82.7065	70000000
11	.	84.4255	71000000
11	.	86.8407	72000000
11	.	89.2117	73000000
11	.	91.1653	74000000
11	.	93.042	75000000
11	.	94.859	76000000
11	.	95.9444	77000000
11	.	96.7902	78000000
11	.	96.8989	79000000
11	.	96.8989	79072521
12	.	0.986061	1000000
12	.	2.07762	2000000
12	.	3.36141	3000000
12	.	5.83131	4000000
12	.	7.78328	5000000
12	.	10.4055	6000000
12	.	13.681	7000000
12	.	16.4996	8000000
12	.	19.5575	9000000
12	.	21.9022	10000000
12	.	24.6098	11000000
12	.	26.4879	12000000
12	.	28.4118	13000000
12	.	29.5937	14000000
12	.	30.858	15000000
12	.	31.8585	16000000
12	.	33.1655	17000000
12	.	35.2467	18000000
12	.	37.4928	19000000
12	.	39.5969	20000000
12	.	43.2881	21000000
12	.	45.9986	22000000
12	.	47.6399	23000000
12	.	49.0158	24000000
12	.	50.5874	25000000
12	.	52.4774	26000000
12	.	53.3369	27000000
12	.	53.7468	28000000
12	.	53.9497	29000000
12	.	54.3027	30000000
12	.	55.0549	31000000
12	.	56.0043	32000000
12	.	57.5629	33000000
12	.	59.0425	34000000
12	.	59.7963	35000000
12	.	60.6983	36000000
12	.	61.7409	37000000
12	.	63.4309	38000000
12	.	64.7146	39000000
12	.	68.2563	40000000
12	.	71.0159	41000000
12	.	73.6133	42000000
12	.	75.4248	43000000
12	.	77.4077	44000000
12	.	78.3181	45000000
12	.	79.7862	46000000
12	.	81.5655	47000000
12	.	83.0439	48000000
12	.	84.0559	49000000
12	.	85.5096	50000000
12	.	86.3647	51000000
12	.	88.0146	52000000
12	.	90.4477	53000000
12	.	93.9967	54000000
12	.	95.865	55000000
12	.	98.9405	56000000
12	.	101.732	57000000
12	.	103.152	58000000
12	.	104.16	59000000
12	.	105.125	60000000
12	.	105.254	61000000
12	.	105.254	61598258
13	.	1.45451	1000000
13	.	3.33915	2000000
13	.	5.80375	3000000
13	.	7.82991	4000000
13	.	10.086	5000000
13	.	11.7487	6000000
13	.	13.2301	7000000
13	.	15.7428	8000000
13	.	17.7251	9000000
13	.	20.4359	10000000
13	.	23.3528	11000000
13	.	26.5662	12000000
13	.	28.7427	13000000
13	.	30.6715	14000000
13	.	31.9628	15000000
13	.	32.9115	16000000
13	.	34.5652	17000000
13	.	35.4536	18000000
13	.	36.2094	19000000
13	.	37.0196	20000000
13	.	37.6784	21000000
13	.	38.8904	22000000
13	.	40.1329	23000000
13	.	41.2635	24000000
13	.	42.7095	25000000
13	.	43.3798	26000000
13	.	44.0541	27000000
13	.	44.599	28000000
13	.	45.286	29000000
13	.	45.5083	30000000
13	.	45.7632	31000000
13	.	46.0336	32000000
13	.	46.328	33000000
13	.	46.7395	34000000
13	.	47.1582	35000000
13	.	47.7781	36000000
13	.	48.2318	37000000
13	.	48.5434	38000000
13	.	48.9305	39000000
13	.	49.2351	40000000
13	.	49.6337	41000000
13	.	49.9863	42000000
13	.	50.4409	43000000
13	.	50.7218	44000000
13	.	51.0149	45000000
13	.	51.4635	46000000
13	.	51.7772	47000000
13	.	52.0734	48000000
13	.	52.2626	49000000
13	.	52.6078	50000000
13	.	53.0633	51000000
13	.	53.5398	52000000
13	.	54.2103	53000000
13	.	54.6866	54000000
13	.	55.0963	55000000
13	.	55.285	56000000
13	.	55.4353	57000000
13	.	55.6499	58000000
13	.	55.8684	59000000
13	.	56.0406	60000000
13	.	56.3835	61000000
13	.	56.5878	62000000
13	.	56.815	63000000
13	.	57.1049	64000000
13	.	57.3289	65000000
13	.	57.6574	66000000
13	.	57.9268	67000000
13	.	58.2525	68000000
13	.	58.4863	69000000
13	.	58.8295	70000000
13	.	59.0074	71000000
13	.	59.2287	72000000
13	.	59.626	73000000
13	.	59.8469	74000000
13	.	60.3654	75000000
13	.	60.7217	76000000
13	.	60.9136	77000000
13	.	61.2081	78000000
13	.	61.393	79000000
13	.	61.8309	80000000
13	.	62.2985	81000000
13	.	62.5817	82000000
13	.	62.8763	83000000
13	.	63.0898	84000000
13	.	63.2823	85000000
13	.	63.4481	86000000
13	.	63.6038	87000000
13	.	63.7982	88000000
13	.	64.0611	89000000
13	.	64.224	90000000
13	.	64.5324	91000000
13	.	64.739	92000000
13	.	64.9314	93000000
13	.	65.0397	94000000
13	.	65.245	95000000
13	.	65.4693	96000000
13	.	65.6553	97000000
13	.	65.7826	98000000
13	.	65.9948	99000000
13	.	66.1484	100000000
13	.	66.2347	101000000
13	.	66.2804	102000000
13	.	66.3609	103000000
13	.	66.4514	104000000
13	.	66.5393	105000000
13	.	66.7025	106000000
13	.	66.8625	107000000
13	.	66.9808	108000000
13	.	67.2157	109000000
13	.	67.3691	110000000
13	.	67.4877	111000000
13	.	67.6158	112000000
13	.	67.789	113000000
13	.	67.9139	114000000
13	.	68.1695	115000000
13	.	68.3511	116000000
13	.	68.5108	117000000
13	.	68.654	118000000
13	.	68.758	119000000
13	.	68.8957	120000000
13	.	69.1024	121000000
13	.	69.3976	122000000
13	.	69.731	123000000
13	.	70.0632	124000000
13	.	70.2905	125000000
13	.	70.5545	126000000
13	.	70.8154	127000000
13	.	71.1597	128000000
13	.	71.5443	129000000
13	.	71.9222	130000000
13	.	72.383	131000000
13	.	72.7842	132000000
13	.	72.9508	133000000
13	.	73.2197	134000000
13	.	73.6129	135000000
13	.	73.9918	136000000
13	.	74.4902	137000000
13	.	74.7209	138000000
13	.	74.8085	139000000
13	.	75.0214	140000000
13	.	75.2114	141000000
13	.	75.4048	142000000
13	.	75.6288	143000000
13	.	75.8687	144000000
13	.	76.0827	145000000
13	.	76.3038	146000000
13	.	76.5347	147000000
13	.	76.8145	148000000
13	.	76.922	149000000
13	.	77.1346	150000000
13	.	77.438	151000000
13	.	77.6876	152000000
13	.	77.8545	153000000
13	.	77.9959	154000000
13	.	78.0958	155000000
13	.	78.2746	156000000
13	.	78.4015	157000000
13	.	78.5962	158000000
13	.	78.768	159000000
13	.	78.9055	160000000
13	.	78.987	161000000
13	.	79.1302	162000000
13	.	79.252	163000000
13	.	79.3308	164000000
13	.	79.4728	165000000
13	.	79.5984	166000000
13	.	79.7942	167000000
13	.	79.9679	168000000
13	.	80.1128	169000000
13	.	80.192	170000000
13	.	80.3148	171000000
13	.	80.4607	172000000
13	.	80.7202	173000000
13	.	81.0214	174000000
13	.	81.4721	175000000
13	.	81.9816	176000000
13	.	82.653	177000000
13	.	83.3386	178000000
13	.	83.9144	179000000
13	.	84.4768	180000000
13	.	84.9156	181000000
13	.	85.5613	182000000
13	.	85.9888	183000000
13	.	86.4334	184000000
13	.	86.8529	185000000
13	.	87.495	186000000
13	.	88.2028	187000000
13	.	89.2127	188000000
13	.	91.0743	189000000
13	.	92.564	190000000
13	.	94.0985	191000000
13	.	96.3862	192000000
13	.	98.4794	193000000
13	.	99.9508	194000000
13	.	102.612	195000000
13	.	105.391	196000000
13	.	107.542	197000000
13	.	110.381	198000000
13	.	112.268	199000000
13	.	114.201	200000000
13	.	115.698	201000000
13	.	117.645	202000000
13	.	120.191	203000000
13	.	122.401	204000000
13	.	126.017	205000000
13	.	127.251	206000000
13	.	128.909	207000000
13	.	129.288	208000000
13	.	129.288	208240759
14	.	5.28477	1000000
14	.	10.7993	2000000
14	.	12.8034	3000000
14	.	17.7993	4000000
14	.	20.3652	5000000
14	.	22.0504	6000000
14	.	24.2572	7000000
14	.	25.4615	8000000
14	.	27.3892	9000000
14	.	29.6557	10000000
14	.	31.0937	11000000
14	.	32.0012	12000000
14	.	33.1502	13000000
14	.	34.4631	14000000
14	.	35.3933	15000000
14	.	36.7101	16000000
14	.	37.5185	17000000
14	.	38.3006	18000000
14	.	39.0301	19000000
14	.	39.9999	20000000
14	.	40.9707	21000000
14	.	41.7618	22000000
14	.	42.7335	23000000
14	.	43.3689	24000000
14	.	44.387	25000000
14	.	45.2093	26000000
14	.	46.1013	27000000
14	.	46.8405	28000000
14	.	47.3332	29000000
14	.	47.6802	30000000
14	.	47.9435	31000000
14	.	48.2772	32000000
14	.	48.8077	33000000
14	.	49.2583	34000000
14	.	49.7047	35000000
14	.	50.1534	36000000
14	.	50.6444	37000000
14	.	51.1164	38000000
14	.	51.3057	39000000
14	.	51.5419	40000000
14	.	51.9283	41000000
14	.	52.3001	42000000
14	.	52.6848	43000000
14	.	53.0094	44000000
14	.	53.241	45000000
14	.	53.4257	46000000
14	.	53.6907	47000000
14	.	53.8744	48000000
14	.	54.0886	49000000
14	.	54.1917	50000000
14	.	54.3483	51000000
14	.	54.4611	52000000
14	.	54.6646	53000000
14	.	54.9743	54000000
14	.	55.2173	55000000
14	.	55.6187	56000000
14	.	56.0462	57000000
14	.	56.3662	58000000
14	.	56.7317	59000000
14	.	56.9889	60000000
14	.	57.2465	61000000
14	.	57.4678	62000000
14	.	57.7438	63000000
14	.	57.9619	64000000
14	.	58.18	65000000
14	.	58.3556	66000000
14	.	58.5359	67000000
14	.	58.704	68000000
14	.	58.8973	69000000
14	.	59.1707	70000000
14	.	59.3924	71000000
14	.	59.7644	72000000
14	.	60.1566	73000000
14	.	60.8048	74000000
14	.	61.1725	75000000
14	.	61.5287	76000000
14	.	61.8674	77000000
14	.	62.2693	78000000
14	.	62.7354	79000000
14	.	63.1403	80000000
14	.	63.869	81000000
14	.	64.3754	82000000
14	.	64.6637	83000000
14	.	64.9712	84000000
14	.	65.1902	85000000
14	.	65.4915	86000000
14	.	65.8477	87000000
14	.	66.3542	88000000
14	.	67.0303	89000000
14	.	67.476	90000000
14	.	67.9202	91000000
14	.	68.1572	92000000
14	.	68.3292	93000000
14	.	68.5305	94000000
14	.	68.8006	95000000
14	.	69.0872	96000000
14	.	69.3832	97000000
14	.	69.8601	98000000
14	.	70.3737	99000000
14	.	70.811	100000000
14	.	71.2569	101000000
14	.	71.9464	102000000
14	.	72.5056	103000000
14	.	72.9891	104000000
14	.	73.4714	105000000
14	.	73.9216	106000000
14	.	74.464	107000000
14	.	75.0158	108000000
14	.	75.6846	109000000
14	.	76.1362	110000000
14	.	76.8004	111000000
14	.	77.3561	112000000
14	.	77.9421	113000000
14	.	78.8196	114000000
14	.	79.7586	115000000
14	.	80.4241	116000000
14	.	81.1768	117000000
14	.	81.7132	118000000
14	.	82.244	119000000
14	.	82.9237	120000000
14	.	84.3378	121000000
14	.	85.4993	122000000
14	.	87.467	123000000
14	.	89.2524	124000000
14	.	90.6672	125000000
14	.	92.6088	126000000
14	.	94.5088	127000000
14	.	96.3384	128000000
14	.	98.1938	129000000
14	.	101.021	130000000
14	.	104.571	131000000
14	.	107.587	132000000
14	.	111.109	133000000
14	.	113.197	134000000
14	.	116.14	135000000
14	.	117.781	136000000
14	.	120.57	137000000
14	.	122.124	138000000
14	.	123.568	139000000
14	.	124.153	140000000
14	.	124.806	141000000
14	.	124.806	141719266
15	.	2.03042	1000000
15	.	3.5678	2000000
15	.	4.98977	3000000
15	.	6.87141	4000000
15	.	8.05397	5000000
15	.	9.20956	6000000
15	.	10.9045	7000000
15	.	12.1016	8000000
15	.	12.7489	9000000
15	.	13.786	10000000
15	.	14.3855	11000000
15	.	15.0445	12000000
15	.	15.7649	13000000
15	.	16.6471	14000000
15	.	17.7762	15000000
15	.	18.7976	16000000
15	.	20.8384	17000000
15	.	22.6897	18000000
15	.	24.5718	19000000
15	.	25.2864	20000000
15	.	26.3958	21000000
15	.	27.042	22000000
15	.	27.7926	23000000
15	.	29.5046	24000000
15	.	30.9745	25000000
15	.	31.7635	26000000
15	.	33.1979	27000000
15	.	34.0254	28000000
15	.	35.5902	29000000
15	.	38.2125	30000000
15	.	39.6462	31000000
15	.	40.3119	32000000
15	.	41.6801	33000000
15	.	42.072	34000000
15	.	42.6024	35000000
15	.	42.9036	36000000
15	.	43.1119	37000000
15	.	43.3207	38000000
15	.	43.6295	39000000
15	.	43.8837	40000000
15	.	44.0381	41000000
15	.	44.4946	42000000
15	.	45.1116	43000000
15	.	46.0318	44000000
15	.	46.9946	45000000
15	.	47.5548	46000000
15	.	48.1746	47000000
15	.	48.8966	48000000
15	.	49.3263	49000000
15	.	49.7019	50000000
15	.	49.9841	51000000
15	.	50.3848	52000000
15	.	50.6826	53000000
15	.	51.0607	54000000
15	.	51.4243	55000000
15	.	51.6528	56000000
15	.	52.007	57000000
15	.	52.5152	58000000
15	.	52.6937	59000000
15	.	52.8717	60000000
15	.	53.0241	61000000
15	.	53.1714	62000000
15	.	53.3054	63000000
15	.	53.4182	64000000
15	.	53.6915	65000000
15	.	53.8982	66000000
15	.	54.0629	67000000
15	.	54.1549	68000000
[truncated: 273 more rows]
